# Supplementary material for: Radiomic and clinical data integration using machine learning predict the efficacy of anti-PD-1 antibodies-based combinational treatment in advanced breast cancer: a multicentered study
Source: PubMed Central journal article supplement — J Immunother Cancer. 2023 May 22;11(5):e006514. doi: 10.1136/jitc-2022-006514 (PMC10230987; doi:10.1136/jitc-2022-006514), 2023-05-22
Supplement: jitc-2022-006514supp001.pdf [file jitc-2022-006514supp001.pdf]

## Supplementary materials

### **Radiomic and clinical data integration using machine learning predict the efficacy of anti-PD-1 antibodies-based combinational treatment in advanced breast cancer: a multi-centered study**

#### **Appendix S1: The inclusion and exclusion criteria**

The inclusion criteria were as follows: (1) Female patients with metastatic breast cancer confirmed by pathology and receiving combined immunotherapy; (2) There should be CE-CT examination of neck, chest or abdomen within 4 weeks before combined immunotherapy, and there must be segmented soft tissue lesions in CE-CT(including liver, chest wall, lymph nodes, breast, and soft tissue lesions adjacent to bone metastasis); (3) Patients should have complete clinical and pathological data.

The exclusion criteria were as follows: (1) Two radiologists unanimously confirmed that the tumor boundary was unclear and difficult to determine or there was no clear three-dimensional region of interest (ROI) of the tumor; (2) Poor CT image quality; (3) The follow-up time is less than 6 weeks (excluding patients with disease progression or death); (4) Baseline without CE-CT image.

#### **Appendix S2: Summary of R packages used**

Logistic regression and Cox regression were performed using the `glm` and `coxph` functions in the R language. The clinical model was constructed using the `rms` package and ROC curves were plotted using the `pROC` package. Calibrate function was used to plot the calibration curve, while violin plots and waterfall plots were generated using the `ggplot2` package. Decision curve analysis (DCA) and clinical impact curve (CIC) were plotted using the `rmDA` package. Survival analysis for progression-free survival (PFS) was conducted using the `survival`, `survminer`, and `survivalROC` packages.

**Table S1** CT scan parameters for each study center

| Center                          | Sun Yat-sen Memorial Hospital,<br>Sun Yat-sen University                             | Affiliated Cancer Hospital of<br>Sun Yat-sen University                                                                                   | The First Hospital of<br>Sun Yat-sen<br>University         |
|---------------------------------|--------------------------------------------------------------------------------------|-------------------------------------------------------------------------------------------------------------------------------------------|------------------------------------------------------------|
| CT<br>Manufacturer<br>and Model | GE Medical Systems (Discovery<br>CT750HD/Revolution EVO);<br>SIEMENS (SOMATOM Force) | United Imaging Healthcare<br>(uCT780/ uCT960+); GE<br>Medical Systems (Discovery<br>CT750HD/Revolution CT);<br>SIEMENS (SOMATOM<br>Force) | Philips (IQon-Spectral<br>CT); TOSHIBA<br>(Aquilion PRIME) |
| Tube Voltage                    | 90-140 KeV (median 120 keV)                                                          |                                                                                                                                           |                                                            |
| Reconstruction<br>thickness     | Layer thickness: 1mm, 1.25mm, 1.5mm, 2.0mm/layer spacing: 1mm, 1.25mm, 1.5mm, 2.0mm  |                                                                                                                                           |                                                            |
| Matrix                          | 512×512 pixels                                                                       |                                                                                                                                           |                                                            |

**Table S2** 1130 radiomics features extracted from baseline CE-CT images using 3D slicer ( V.4.11.20210226; <https://www.slicer.org/> )

| Feature Category                           | Number of features | Feature Name                   |
|--------------------------------------------|--------------------|--------------------------------|
| Original_Shape                             | 14                 | 1.Elongation                   |
|                                            |                    | 2.Flatness                     |
|                                            |                    | 3.Least Axis Length            |
|                                            |                    | 4.Major Axis Length            |
|                                            |                    | 5.Maximum 2D Diameter (Column) |
|                                            |                    | 6.Maximum 2D Diameter (Row)    |
|                                            |                    | 7.Maximum 2D Diameter (Slice)  |
|                                            |                    | 8.Maximum 3D Diameter          |
|                                            |                    | 9.Mesh Volume                  |
|                                            |                    | 10.Minor Axis Length           |
|                                            |                    | 11.Sphericity                  |
|                                            |                    | 12.Surface Area                |
|                                            |                    | 13.Surface Volume Ratio        |
|                                            |                    | 14.Voxel Volume                |
| Original_First Order<br>Histogram Features | 18                 | 1.The 10th percentile of X     |
|                                            |                    | 2.The 90th percentile of X     |
|                                            |                    | 3.Energy                       |
|                                            |                    | 4.Entropy                      |
|                                            |                    | 5.Interquartile Range          |
|                                            |                    | 6.Kurtosis                     |
|                                            |                    | 7.Maximum                      |
|                                            |                    | 8.Mean Absolute Deviation      |

|               |    |                                                 |
|---------------|----|-------------------------------------------------|
|               |    | 9.Mean Intensity                                |
|               |    | 10.Median Intensity                             |
|               |    | 11.Minimum Intensity                            |
|               |    | 12.Range                                        |
|               |    | 13.Robust Mean Absolute Deviation               |
|               |    | 14.Root Mean Squared                            |
|               |    | 15.Skewness                                     |
|               |    | 16.Total Energy                                 |
|               |    | 17.Uniformity                                   |
|               |    | 18.Variance                                     |
| Original_GLCM | 24 | 1.Autocorrelation                               |
|               |    | 2.Cluster Prominence                            |
|               |    | 3.Cluster Shade                                 |
|               |    | 4.Cluster Tendency                              |
|               |    | 5.Contrast                                      |
|               |    | 6.Correlation                                   |
|               |    | 7.Difference Average                            |
|               |    | 8.Difference Entropy                            |
|               |    | 9.Difference Variance                           |
|               |    | 10.ID(inverse difference)                       |
|               |    | 11.IDM(inverse difference moment)               |
|               |    | 12.IDMN(inverse difference moment normalized)   |
|               |    | 13.IDN(Inverse difference normalized)           |
|               |    | 14.IMC1(Informational measure of correlation 1) |
|               |    | 15.IMC2(Informational measure of correlation 2) |
|               |    | 16.Inverse Variance                             |
|               |    | 17.Joint Average                                |
|               |    | 18.Joint Energy                                 |
|               |    | 19.Joint Entropy                                |
|               |    | 20.MCC                                          |
|               |    | 21.Maximum Probability                          |
|               |    | 22.Sum Average                                  |
|               |    | 23.Sum Entropy                                  |
|               |    | 24.Sum Squares                                  |
| Original_GLDM | 14 | 1.Dependence Entropy                            |
|               |    | 2.Dependence Non-Uniformity                     |
|               |    | 3.Dependence Non-Uniformity Normalized          |
|               |    | 4.Dependence Variance                           |
|               |    | 5.Gray Level Non-Uniformity                     |
|               |    | 6.Gray Level Variance                           |
|               |    | 7.High Gray Level Emphasis                      |
|               |    | 8.Large Dependence Emphasis                     |
|               |    | 9.Large Dependence High Gray Level Emphasis     |

|                   |     |                                              |
|-------------------|-----|----------------------------------------------|
|                   |     | 10.Large Dependence Low Gray Level Emphasis  |
|                   |     | 11.Low Gray Level Emphasis                   |
|                   |     | 12.Small Dependence Emphasis                 |
|                   |     | 13.Small Dependence High Gray Level Emphasis |
|                   |     | 14.Small Dependence Low Gray Level Emphasis  |
| Original_GLRLM    | 16  | 1.Gray Level Non-Uniformity                  |
|                   |     | 2.Gray Level Non-Uniformity Normalized       |
|                   |     | 3.Gray Level Variance                        |
|                   |     | 4.High Gray Level Run Emphasis               |
|                   |     | 5.Long Run Emphasis                          |
|                   |     | 6.Long Run High Gray Level Emphasis          |
|                   |     | 7.Long Run Low Gray Level Emphasis           |
|                   |     | 8.Low Gray Level Run Emphasis                |
|                   |     | 9.Run Entropy                                |
|                   |     | 10.Run Length Non-Uniformity                 |
|                   |     | 11.Run Length Non-Uniformity Normalized      |
|                   |     | 12.Run Percentage                            |
|                   |     | 13.Run Variance                              |
|                   |     | 14.Short Run Emphasis                        |
|                   |     | 15.Short Run High Gray Level Emphasis        |
|                   |     | 16.Short Run Low Gray Level Emphasis         |
| Original_GLSZM    | 16  | 1.Gray Level Non-Uniformity                  |
|                   |     | 2.Gray Level Non-Uniformity Normalized       |
|                   |     | 3.Gray Level Variance                        |
|                   |     | 4.High Gray Level Zone Emphasis              |
|                   |     | 5.Large Area Emphasis                        |
|                   |     | 6.Large Area High Gray Level Emphasis        |
|                   |     | 7.Large Area Low Gray Level Emphasis         |
|                   |     | 8.Low Gray Level Zone Emphasis               |
|                   |     | 9.Size Zone Non-Uniformity                   |
|                   |     | 10.Size Zone Non-Uniformity Normalized       |
|                   |     | 11.Small Area Emphasis                       |
|                   |     | 12.Small Area High Gray Level Emphasis       |
|                   |     | 13.Small Area Low Gray Level Emphasis        |
|                   |     | 14.Zone Entropy                              |
|                   |     | 15.Zone Percentage                           |
|                   |     | 16.Zone Variance                             |
| Original_NGTDm    | 5   | 1.Busyness                                   |
|                   |     | 2.Coarseness                                 |
|                   |     | 3.Complexity                                 |
|                   |     | 4.Contrast                                   |
|                   |     | 5.Strength                                   |
| Wavelet transform | 744 | wavelet-LLH                                  |

|               |     |                  |
|---------------|-----|------------------|
|               |     | wavelet-LHL      |
|               |     | wavelet-LHH      |
|               |     | wavelet-HLL      |
|               |     | wavelet-HLH      |
|               |     | wavelet-HHH      |
|               |     | wavelet-LLL      |
| LoG transform | 279 | LoG-sigma-1mm-3D |
|               |     | LoG-sigma-2mm-3D |
|               |     | LoG-sigma-3mm-3D |

**Table S3** Performance of the PD-L1 models in training and validation sets

| Variables      | PD-L1 model(CPS score) |                    | PD-L1 model ( CPS cut off 10 ) |                    |
|----------------|------------------------|--------------------|--------------------------------|--------------------|
|                | Training set           | Testing set        | Training set                   | Testing set        |
| AUC ( 95% CI ) | 0.555(0.442-0.669)     | 0.839(0.512-1.000) | 0.530(0.433-0.628)             | 0.661(0.346-0.976) |
| SEN            | 0.622                  | 0.750              | 0.378                          | 0.750              |
| SPE            | 0.545                  | 1.000              | 0.682                          | 0.571              |
| ACC            | 0.573                  | 0.909              | 0.573                          | 0.636              |
| PPV            | 0.434                  | 1.000              | 0.400                          | 0.500              |
| NPV            | 0.720                  | 0.875              | 0.662                          | 0.800              |

Note: AUC: area under the receiver operating curve; CI: confidence interval; SEN: sensitivity; SPE: specificity; ACC: accuracy; PPV: positive predictive value; NPV: negative predictive value.

**Table S4** Pre-scores of predict models in training set and testing set

| Training set    | Non-responders ( N=110 )  | Responders ( N=61 )      | P value |
|-----------------|---------------------------|--------------------------|---------|
| Clinical Model  | -0.707 ( -1.371, -0.346 ) | -0.346 ( -0.707, 0.236 ) | < 0.001 |
| Radiomics Model | -1.232 ( -1.679, -0.782 ) | 0.487 ( 0.270, 0.731 )   | < 0.001 |
| Combined Model  | -1.429 ( -1.843, -1.141 ) | 0.976 ( 0.510, 1.513 )   | < 0.001 |

Note: Values refer to median (interquartile range).

| Testing set     | Non-responders ( N=45 )  | Responders ( N=24 )     | P value |
|-----------------|--------------------------|-------------------------|---------|
| Clinical Model  | -1.005 ( -1.045,-0.869 ) | -0.446 ( -1.015,0.019 ) | 0.067   |
| Radiomics Model | -1.100 ( -1.565,-0.764 ) | 0.495 ( 0.312,0.759 )   | < 0.001 |

Combined Model      -1.405 ( -1.816,-1.091 )      1.121 ( 0.673,1.708 )      < 0.001

Note: Values refer to median (interquartile range).

**Table S5** C-indexes, corresponding 95% CIs, cut-off points and the relative HRs with 95% CIs of Radiomics model, and Combined model in predicting PFS for training and validation cohorts.

| Cohort            | Model           | PFS Prediction |             |                |       |                | P value* |
|-------------------|-----------------|----------------|-------------|----------------|-------|----------------|----------|
|                   |                 | cut-off point  | C-index±SE  | C-index 95% CI | HR    | HR 95% CI      |          |
| Training cohort   | Radiomics model | 0.209          | 0.646±0.019 | [0.609, 0.683] | 2.705 | [1.888, 3.876] | < 0.001  |
|                   | Combined model  | -0.086         | 0.646±0.019 | [0.609, 0.683] | 2.464 | [1.720, 3.529] | < 0.001  |
| Validation cohort | Radiomicsmodel  | -0.424         | 0.627±0.036 | [0.556, 0.698] | 2.625 | [1.506, 4.574] | 0.001    |
|                   | Combined model  | -0.857         | 0.619±0.037 | [0.546, 0.692] | 2.564 | [1.469, 4.475] | 0.001    |

Note: SE: Standard Error; CI: confidence interval; HR: Hazard Ratio; \*using Log-rank test to determine the P-value.

**Table S6** The details information of PFS prediction for Radiomics model, and Combined model in predicting PFS for training and validation cohorts.

| Value            | Radiomics model Training set |           | Radiomics model Testing set |           | Combined model Training set |           | Combined model Testing set |           |
|------------------|------------------------------|-----------|-----------------------------|-----------|-----------------------------|-----------|----------------------------|-----------|
|                  | Low risk                     | High risk | Low risk                    | High risk | Low risk                    | High risk | Low risk                   | High risk |
|                  | n                            | 52        | 119                         | 30        | 39                          | 56        | 115                        | 30        |
| events           | 30                           | 89        | 15                          | 35        | 34                          | 85        | 16                         | 34        |
| Median PFS ( m ) | 10.12                        | 3.75      | 7.26                        | 3.02      | 8.77                        | 3.71      | 9.79                       | 3.02      |
| 0.95%L CL        | 8.25                         | 3.09      | 5.78                        | 2.10      | 7.56                        | 2.89      | 3.37                       | 2.10      |
| 0.95% U CL       | 13.83                        | 4.37      | NA                          | 4.93      | 10.64                       | 4.37      | NA                         | 5.13      |

Note: NA:Not available.

**Table S7** The details information for the subgroup of “Comprehensive positive score” in training cohort and validation cohort

| Performance  | Radiomics model Training cohort |          | Radiomics model Validation cohort |                    |
|--------------|---------------------------------|----------|-----------------------------------|--------------------|
|              | CPS < 10                        | CPS ≥ 10 | CPS < 10                          | CPS ≥ 10           |
| AUC (95% CI) | 0.996(0.989-1.000)              | 1.000    | 1.000                             | 0.778(0.291-1.000) |

|     |       |       |       |       |
|-----|-------|-------|-------|-------|
| SEN | 0.957 | 1.000 | 1.000 | 0.667 |
| SPE | 0.978 | 1.000 | 1.000 | 1.000 |
| ACC | 0.971 | 1.000 | 1.000 | 0.833 |
| PPV | 0.957 | 1.000 | 1.000 | 1.000 |
| NPV | 0.978 | 1.000 | 1.000 | 0.750 |

Note: AUC: area under the receiver operating curve; CI: confidence interval; SEN: sensitivity; SPE: specificity; ACC: accuracy; PPV: positive predictive value; NPV: negative predictive value; CPS: Combined positive score.

| Performance  | Combined model Training cohort |          | Combined model Validation cohort |          |
|--------------|--------------------------------|----------|----------------------------------|----------|
|              | CPS < 10                       | CPS ≥ 10 | CPS < 10                         | CPS ≥ 10 |
| AUC (95% CI) | 0.997(0.991-1.000)             | 1.000    | 1.000                            | 1.000    |
| SEN          | 1.000                          | 1.000    | 1.000                            | 1.000    |
| SPE          | 0.956                          | 1.000    | 1.000                            | 1.000    |
| ACC          | 0.971                          | 1.000    | 1.000                            | 1.000    |
| PPV          | 0.920                          | 1.000    | 1.000                            | 1.000    |
| NPV          | 1.000                          | 1.000    | 1.000                            | 1.000    |

Note: AUC: area under the receiver operating curve; CI: confidence interval; SEN: sensitivity; SPE: specificity; ACC: accuracy; PPV: positive predictive value; NPV: negative predictive value; CPS: Combined positive score.

**Table S8** The details information for the subgroup of “molecular subgroup” in training cohort and validation cohort

| Performance | Radiomics model Training cohort |                    | Radiomics model Validation cohort |                    |
|-------------|---------------------------------|--------------------|-----------------------------------|--------------------|
|             | Non-TNBC                        | TNBC               | Non-TNBC                          | TNBC               |
| AUC (95%CI) | 0.994(0.978-1.000)              | 0.997(0.992-1.000) | 0.988(0.955-1.000)                | 0.910(0.789-1.000) |
| SEN         | 1.000                           | 0.980              | 1.000                             | 0.889              |
| SPE         | 0.962                           | 0.988              | 0.929                             | 1.000              |
| ACC         | 0.974                           | 0.985              | 0.950                             | 0.959              |
| PPV         | 0.923                           | 0.980              | 0.857                             | 1.000              |
| NPV         | 1.000                           | 0.988              | 1.000                             | 0.939              |

Note: AUC: area under the receiver operating curve; CI: confidence interval; SEN: sensitivity; SPE: specificity; ACC: accuracy; PPV: positive predictive value; NPV: negative predictive value; TNBC: triple negative breast cancer

| Performance | Combined model Training cohort |                    | Combined model Validation cohort |                    |
|-------------|--------------------------------|--------------------|----------------------------------|--------------------|
|             | Non-TNBC                       | TNBC               | Non-TNBC                         | TNBC               |
| AUC (95%CI) | 0.981(0.941-1.000)             | 0.999(0.999-1.000) | 1.000                            | 0.950(0.851-1.000) |
| SEN         | 0.917                          | 1.000              | 1.000                            | 0.944              |
| SPE         | 1.000                          | 0.976              | 1.000                            | 1.000              |
| ACC         | 0.974                          | 0.985              | 1.000                            | 0.980              |
| PPV         | 1.000                          | 0.961              | 1.000                            | 1.000              |
| NPV         | 0.963                          | 1.000              | 1.000                            | 0.969              |

Note: AUC: area under the receiver operating curve; CI: confidence interval; SEN: sensitivity; SPE: specificity;

ACC: accuracy; PPV: positive predictive value; NPV: negative predictive value; TNBC: triple negative breast cancer

**Table S9** The details information for the subgroup of “lines of previous therapy in the context of metastatic disease ” in training cohort and validation cohort

| Performance  | Radiomics model Training cohort |                    | Radiomics model Validation cohort |                    |
|--------------|---------------------------------|--------------------|-----------------------------------|--------------------|
|              | 1                               | ≥2                 | 1                                 | ≥2                 |
| AUC (95% CI) | 0.993(0.981-1.000)              | 0.995(0.987-1.000) | 1.000                             | 0.843(0.655-1.000) |
| SEN          | 0.964                           | 0.939              | 1.000                             | 0.750              |
| SPE          | 0.968                           | 0.987              | 1.000                             | 1.000              |
| ACC          | 0.966                           | 0.973              | 1.000                             | 0.935              |
| PPV          | 0.964                           | 0.969              | 1.000                             | 1.000              |
| NPV          | 0.968                           | 0.975              | 1.000                             | 0.919              |

Note: AUC: area under the receiver operating curve; CI: confidence interval; SEN: sensitivity; SPE: specificity; ACC: accuracy; PPV: positive predictive value; NPV: negative predictive value.

| Performance  | Combined model Training cohort |                    | Combined model Validation cohort |                    |
|--------------|--------------------------------|--------------------|----------------------------------|--------------------|
|              | 1                              | ≥2                 | 1                                | ≥2                 |
| AUC (95% CI) | 0.997(0.989-1.000)             | 0.998(0.996-1.000) | 1.000                            | 0.922(0.768-1.000) |
| SEN          | 0.964                          | 1.000              | 1.000                            | 0.917              |
| SPE          | 1.000                          | 0.975              | 1.000                            | 1.000              |
| ACC          | 0.983                          | 0.982              | 1.000                            | 0.978              |
| PPV          | 1.000                          | 0.943              | 1.000                            | 1.000              |
| NPV          | 0.969                          | 1.000              | 1.000                            | 0.971              |

Note: AUC: area under the receiver operating curve; CI: confidence interval; SEN: sensitivity; SPE: specificity; ACC: accuracy; PPV: positive predictive value; NPV: negative predictive value.

**Table S10** The details information for the subgroup of “number of metastatic sites” in training cohort and validation cohort

| Performance  | Radiomics model Training cohort |                    | Radiomics model Validation cohort |       |
|--------------|---------------------------------|--------------------|-----------------------------------|-------|
|              | 1-2                             | ≥3                 | 1-2                               | ≥3    |
| AUC (95% CI) | 0.999(0.998-1.000)              | 0.984(0.965-1.000) | 0.857(0.691-1.000)                | 1.000 |
| SEN          | 1.000                           | 1.000              | 0.786                             | 1.000 |
| SPE          | 0.978                           | 0.891              | 1.000                             | 1.000 |
| ACC          | 0.989                           | 0.917              | 0.914                             | 1.000 |
| PPV          | 0.976                           | 0.741              | 1.000                             | 1.000 |
| NPV          | 1.000                           | 1.000              | 0.875                             | 1.000 |

Note: AUC: area under the receiver operating curve; CI: confidence interval; SEN: sensitivity; SPE: specificity; ACC: accuracy; PPV: positive predictive value; NPV: negative predictive value.

| Performance | Combined model Training cohort | Combined model Validation cohort |
|-------------|--------------------------------|----------------------------------|
|-------------|--------------------------------|----------------------------------|



|              | 1-2   | ≥3                 | 1-2                | ≥3    |
|--------------|-------|--------------------|--------------------|-------|
| AUC (95% CI) | 1.000 | 0.988(0.971-1.000) | 0.932(0.799-1.000) | 1.000 |
| SEN          | 1.000 | 0.950              | 0.929              | 1.000 |
| SPE          | 1.000 | 0.953              | 1.000              | 1.000 |
| ACC          | 1.000 | 0.952              | 0.971              | 1.000 |
| PPV          | 1.000 | 0.864              | 1.000              | 1.000 |
| NPV          | 1.000 | 0.984              | 0.955              | 1.000 |

Note: AUC: area under the receiver operating curve; CI: confidence interval; SEN: sensitivity; SPE: specificity; ACC: accuracy; PPV: positive predictive value; NPV: negative predictive value.

**Table S11** The details information for the subgroup of “Visceral metastasis” in training cohort and validation cohort

| Performance  | Radiomics model Training cohort |                    | Radiomics model Validation cohort |                    |
|--------------|---------------------------------|--------------------|-----------------------------------|--------------------|
|              | No                              | Yes                | No                                | Yes                |
| AUC (95% CI) | 0.997(0.989-1.000)              | 0.994(0.984-1.000) | 0.900(0.736-1.000)                | 0.939(0.818-1.000) |
| SEN          | 0.971                           | 0.923              | 0.800                             | 0.929              |
| SPE          | 1.000                           | 1.000              | 1.000                             | 1.000              |
| ACC          | 0.987                           | 0.979              | 0.926                             | 0.976              |
| PPV          | 1.000                           | 1.000              | 1.000                             | 1.000              |
| NPV          | 0.977                           | 0.971              | 0.895                             | 0.966              |

Note: AUC: area under the receiver operating curve; CI: confidence interval; SEN: sensitivity; SPE: specificity; ACC: accuracy; PPV: positive predictive value; NPV: negative predictive value.

| Performance  | Combined model Training cohort |                    | Combined model Validation cohort |       |
|--------------|--------------------------------|--------------------|----------------------------------|-------|
|              | No                             | Yes                | No                               | Yes   |
| AUC (95% CI) | 0.997(0.991-1.000)             | 0.997(0.992-1.000) | 0.900(0.704-1.000)               | 1.000 |
| SEN          | 0.971                          | 1.000              | 0.900                            | 1.000 |
| SPE          | 1.000                          | 0.956              | 1.000                            | 1.000 |
| ACC          | 0.987                          | 0.968              | 0.963                            | 1.000 |
| PPV          | 1.000                          | 0.897              | 1.000                            | 1.000 |
| NPV          | 0.977                          | 1.000              | 0.944                            | 1.000 |

Note: AUC: area under the receiver operating curve; CI: confidence interval; SEN: sensitivity; SPE: specificity; ACC: accuracy; PPV: positive predictive value; NPV: negative predictive value.

**Table S12** The details information for the subgroup of “Combined immunotherapy regimen” in training cohort and validation cohort

| Performance | Radiomics model Training cohort |                                           | Radiomics model Validation cohort |                                           |
|-------------|---------------------------------|-------------------------------------------|-----------------------------------|-------------------------------------------|
|             | Immunotherapy +<br>Chemotherapy | Immunotherapy +<br>Antiangiogenic therapy | Immunotherapy<br>+Chemotherapy    | Immunotherapy +<br>Antiangiogenic therapy |
|             |                                 | ±Chemotherapy                             |                                   | ±Chemotherapy                             |
| AUC         | 0.996                           | 0.993                                     | 0.980                             | 0.717                                     |

| (95% CI) | ( 0.989-1.000 ) | ( 0.983-1.000 ) | ( 0.939-1.000 ) | ( 0.361-1.000 ) |
|----------|-----------------|-----------------|-----------------|-----------------|
| SEN      | 0.964           | 0.939           | 0.944           | 0.667           |
| SPE      | 0.982           | 0.981           | 1.000           | 1.000           |
| ACC      | 0.976           | 0.966           | 0.977           | 0.923           |
| PPV      | 0.964           | 0.969           | 1.000           | 1.000           |
| NPV      | 0.982           | 0.964           | 0.962           | 0.909           |

Note: AUC: area under the receiver operating curve; CI: confidence interval; SEN: sensitivity; SPE: specificity; ACC: accuracy; PPV: positive predictive value; NPV: negative predictive value.

| Performance | Combined model Training cohort |                                                      | Combined model Validation cohort |                                                      |
|-------------|--------------------------------|------------------------------------------------------|----------------------------------|------------------------------------------------------|
|             | Immunotherapy + chemotherapy   | Immunotherapy + antiangiogenic therapy± chemotherapy | Immunotherapy + chemotherapy     | Immunotherapy + antiangiogenic therapy± chemotherapy |
| AUC         | 0.995                          | 0.998                                                | 1.000                            | 0.850                                                |
| (95% CI)    | ( 0.984-1.000 )                | ( 0.995-1.000 )                                      |                                  | ( 0.555-1.000 )                                      |
| SEN         | 0.964                          | 1.000                                                | 1.000                            | 0.833                                                |
| SPE         | 1.000                          | 0.963                                                | 1.000                            | 1.000                                                |
| ACC         | 0.988                          | 0.977                                                | 1.000                            | 0.962                                                |
| PPV         | 1.000                          | 0.943                                                | 1.000                            | 1.000                                                |
| NPV         | 0.982                          | 1.000                                                | 1.000                            | 0.952                                                |

Note: AUC: area under the receiver operating curve; CI: confidence interval; SEN: sensitivity; SPE: specificity; ACC: accuracy; PPV: positive predictive value; NPV: negative predictive value.
