# Supplementary figures and images for: Radiomic and clinical data integration using machine learning predict the efficacy of anti-PD-1 antibodies-based combinational treatment in advanced breast cancer: a multicentered study
Source: PubMed Central journal article supplement — J Immunother Cancer. 2023 May 22;11(5):e006514. doi: 10.1136/jitc-2022-006514 (PMC10230987; doi:10.1136/jitc-2022-006514), 2023-05-22

**A**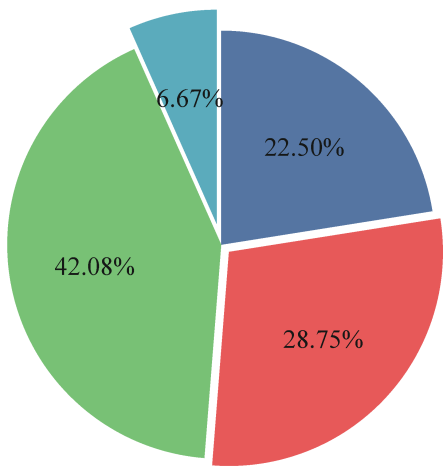

Entire cohort(N=240)

**B**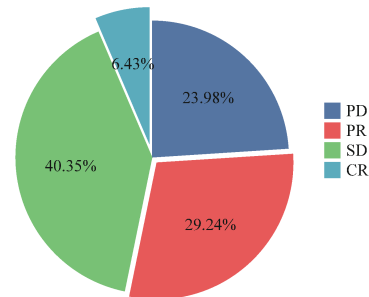

Training set(N=171)

**C**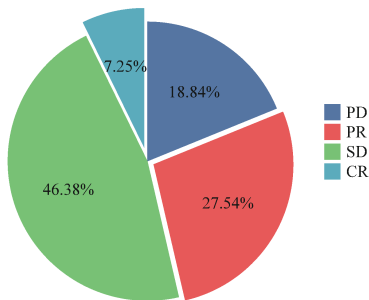

Testing set(N=69)

Supplement: jitc-2022-006514supp002.pdf [file jitc-2022-006514supp002.pdf]

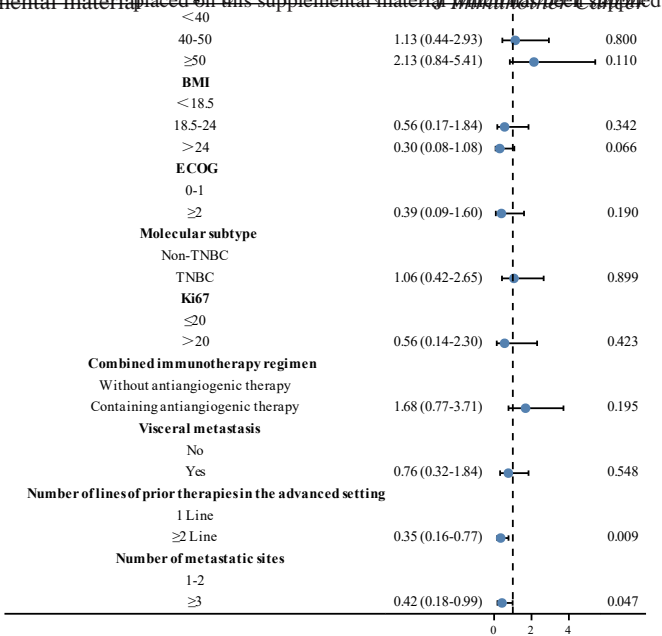

Supplement: jitc-2022-006514supp003.pdf [file jitc-2022-006514supp003.pdf]

**A**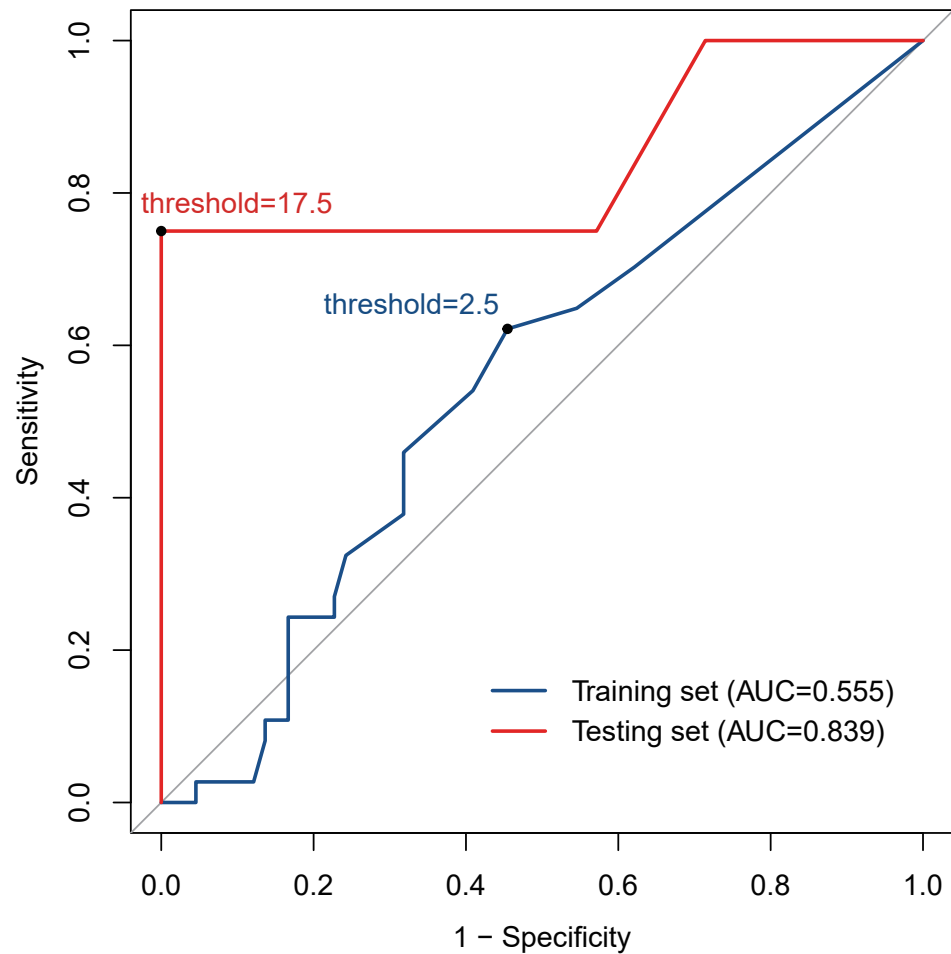**B**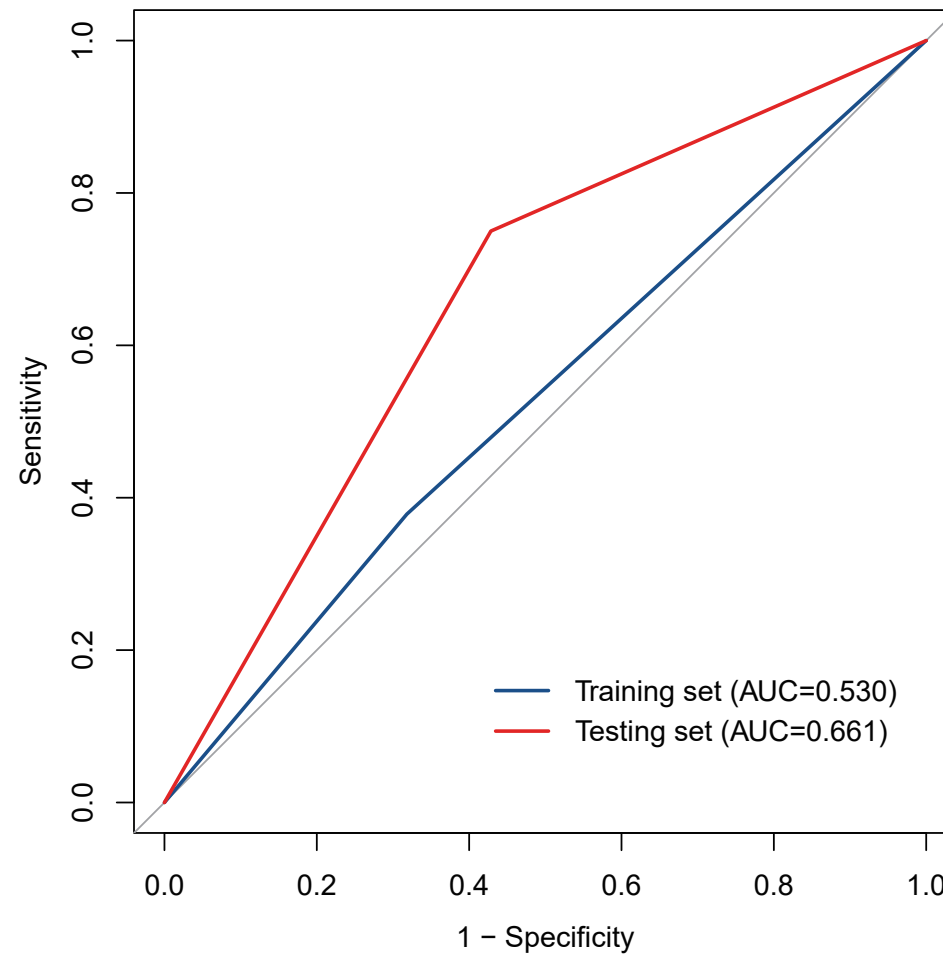

Supplement: jitc-2022-006514supp004.pdf [file jitc-2022-006514supp004.pdf]

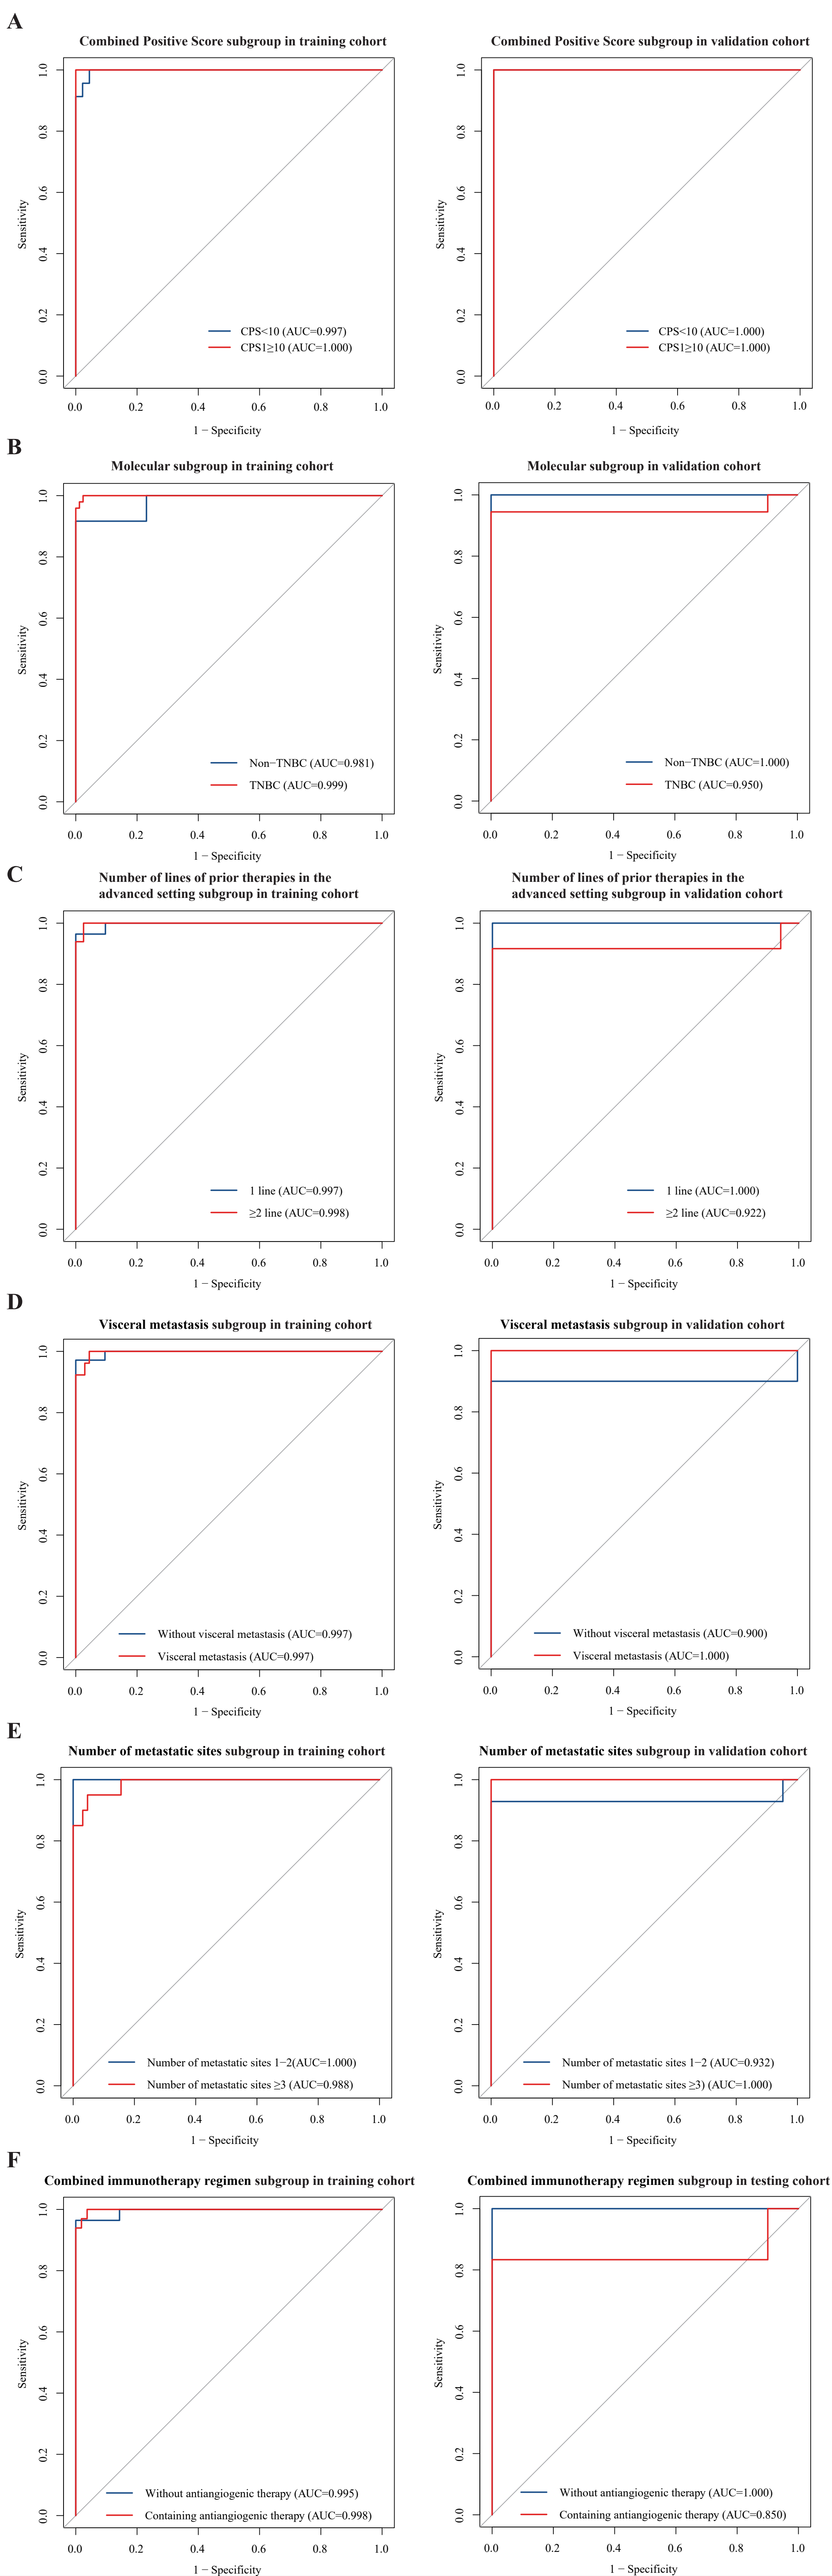

Supplement: jitc-2022-006514supp005.pdf [file jitc-2022-006514supp005.pdf]
